# Supplementary material
Source: PubMed Central journal article supplement (PMC5035555)
Supplement: NIHMS773109-supplement-1.pdf [file NIHMS773109-supplement-1.pdf]

**Figure S1:** Graphical presentation of different methods of adherence calculation. Abbreviations: PDC: proportion of days covered; MPR: medication possession ratio.

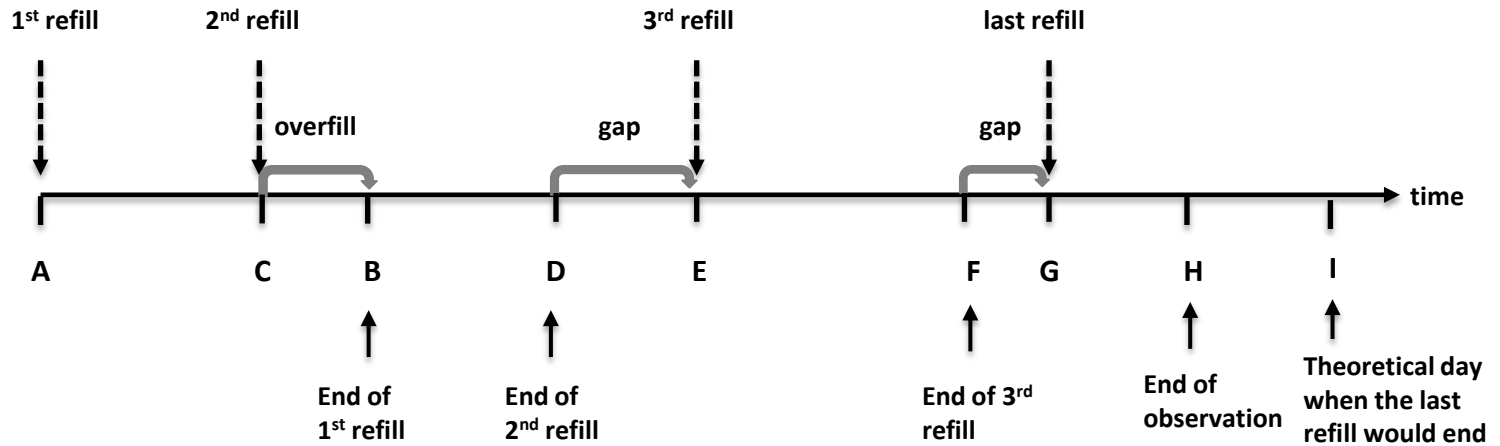

PDC- days of drug available over number of days in observation period capped at 1

$$\text{PDC} = (\text{AC} + \text{CD} + \text{EF} + \text{GI}) / \text{AH} \text{ capped at } 1 (100\%) \text{ max}$$

MPR- total days drug supply is available (without truncation) over number of days in observation period

$$\text{MPR} = (\text{AB} + \text{CD} + \text{EF} + \text{GI}) / \text{AH}$$
