# Supplementary material
Source: PubMed Central journal article supplement (PMC5035555)
Supplement: NIHMS773109-supplement-2.pdf [file NIHMS773109-supplement-2.pdf]

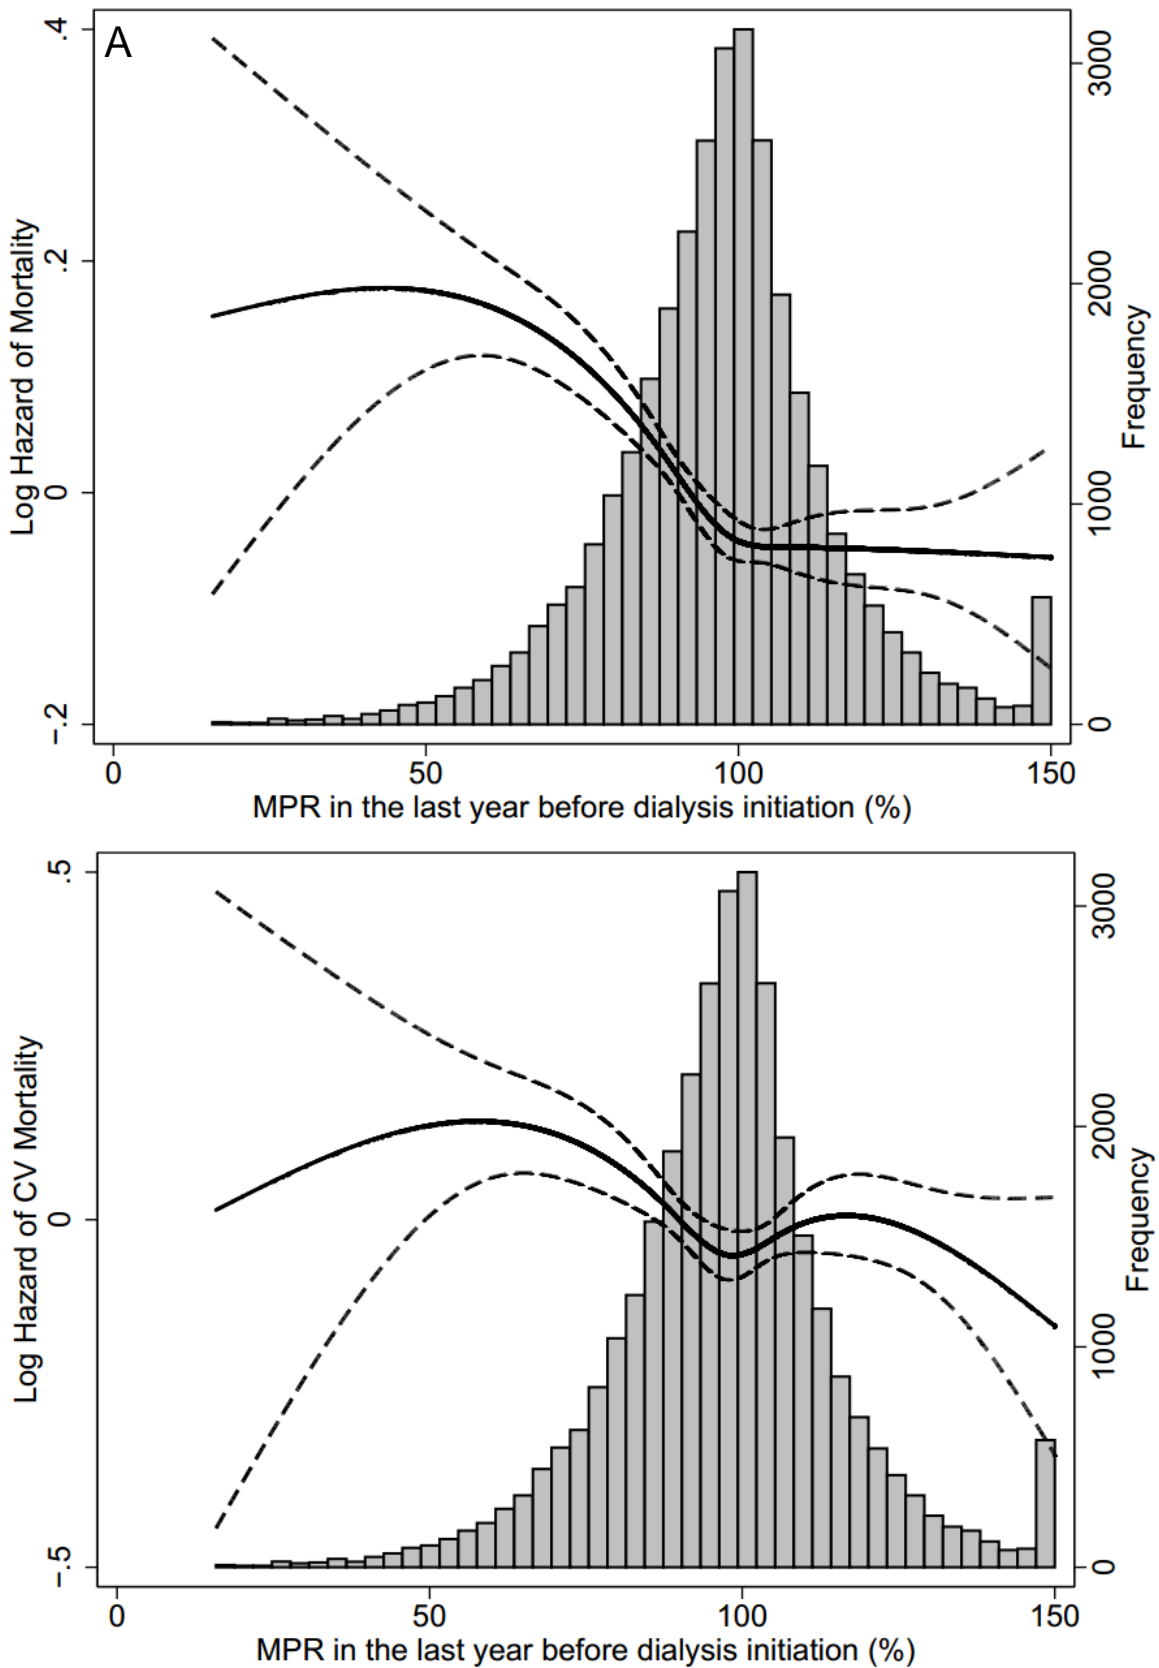

**Figure S2:** Association between percentage of medication possession ratio (MPR) in the last year before ESRD and post-dialysis initiation all-cause mortality (panel A) and cardiovascular mortality (panel B) using fractional polynomials and restricted cubic splines (model adjusted for age, sex, race, marital status, ZIP code, CCI, presence of diabetes, congestive heart failure, cardiovascular/cerebrovascular disease, presence of depression, presence of anxiety and type of vascular access)
