# Supplementary material
Source: PubMed Central journal article supplement (PMC5035555)
Supplement: NIHMS773109-supplement-3.pdf [file NIHMS773109-supplement-3.pdf]

Reference category: 100% > MPR > 80%

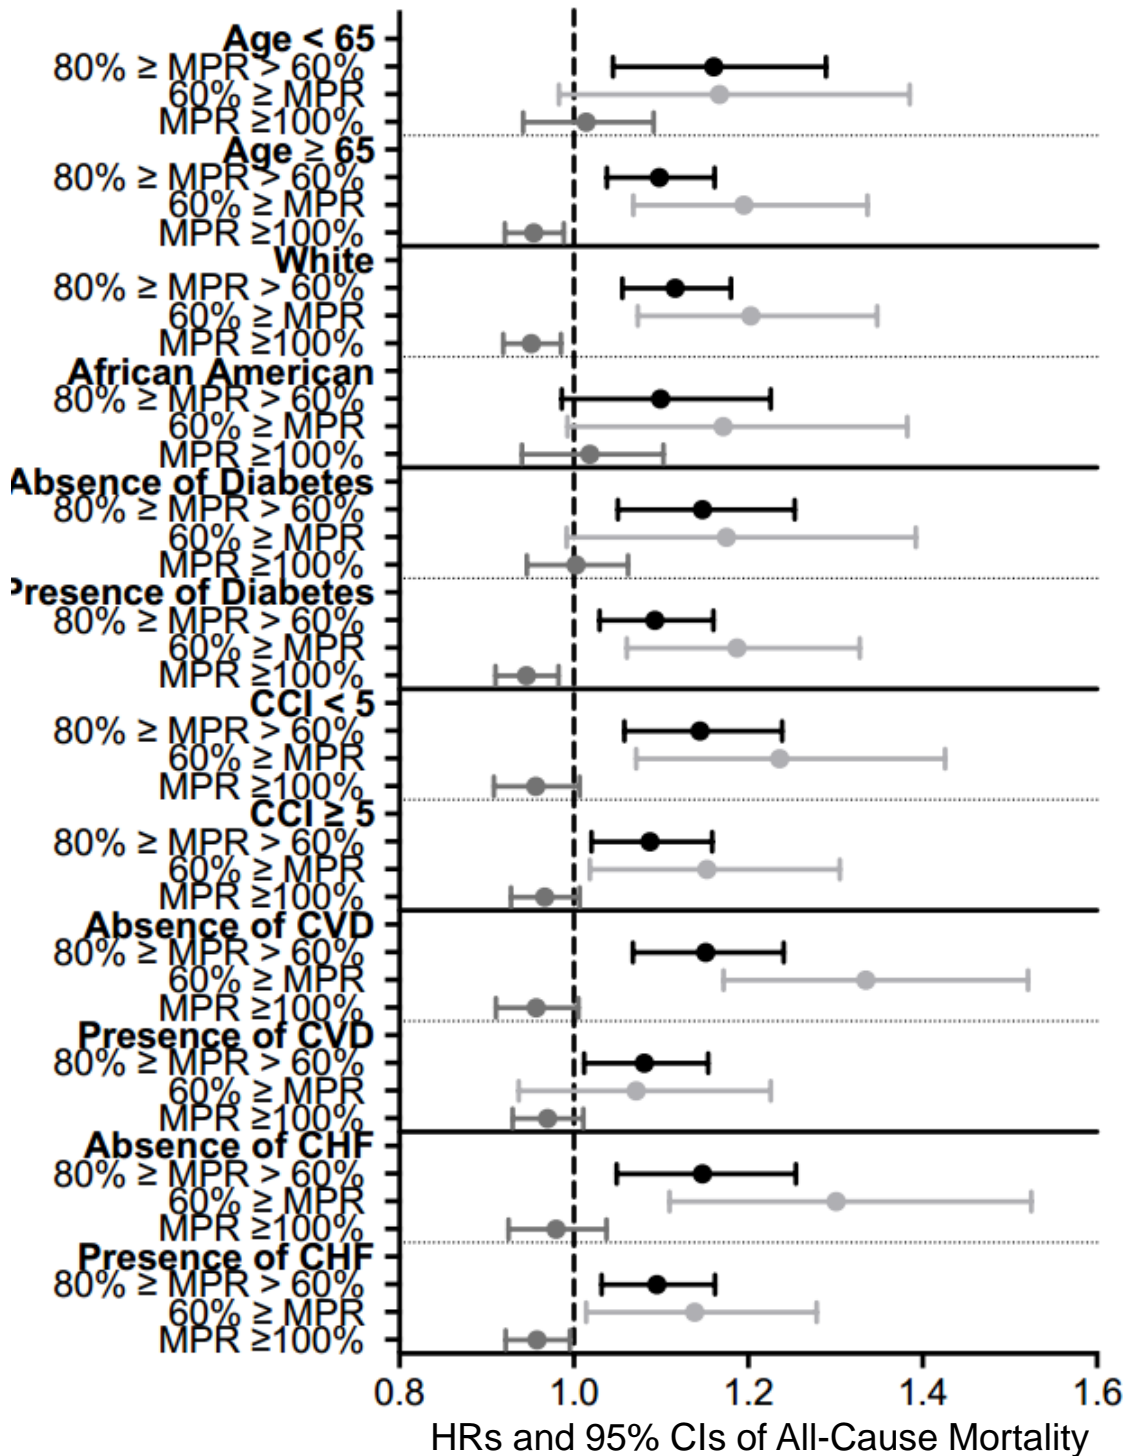

**Figure S3:** Association between percentage of medication possession ratio (MPR) in the last year before ESRD and post-dialysis initiation mortality in different subgroups of patients using adjusted Cox regression analyses (model adjusted for age, sex, race, marital status, ZIP code, CCI, presence of diabetes, congestive heart failure, cardiovascular/cerebrovascular disease, presence of depression, presence of anxiety and type of vascular access)
