# Supplementary material
Source: PubMed Central journal article supplement (PMC5035555)
Supplement: NIHMS773109-supplement-4.pdf [file NIHMS773109-supplement-4.pdf]

**Table S1:** Baseline characteristics of the included versus excluded patients

|                                                       | <b>Included<br/>(N=32,348)</b> | <b>Excluded<br/>(N=19,824)</b> |
|-------------------------------------------------------|--------------------------------|--------------------------------|
| <b>Socio-demographic</b>                              |                                |                                |
| Age (years); mean (SD)                                | 72 (11)                        | 69 (13)                        |
| Sex (male); n (%)                                     | 31,045 (96)                    | 18,187 (92)                    |
| <i>Race; n (%)</i>                                    |                                |                                |
| White                                                 | 24,064 (74)                    | 13,845 (70)                    |
| African American                                      | 7,531 (23)                     | 5,103 (26)                     |
| <i>Marital Status; n (%)</i>                          |                                |                                |
| Married                                               | 18,654 (58)                    | 10,716 (57)                    |
| Non-married                                           | 13,242 (42)                    | 9,108 (43)                     |
| <b>Comorbidities; n (%)</b>                           |                                |                                |
| Charlson Comorbidity Index; median (IQR)              | 5 (3-7)                        | 4 (2-6)                        |
| Diabetes                                              | 22,144 (69)                    | 7,805 (55)                     |
| Cardiovascular/cerebrovascular Diseases               | 16,117 (50)                    | 5,806 (29)                     |
| Myocardial Infarction                                 | 9,674 (30)                     | 3,608 (26)                     |
| Congestive Heart Failure                              | 19,270 (60)                    | 7,058 (50)                     |
| Peripheral Vascular Disease                           | 13,608 (43)                    | 4,724 (33)                     |
| Hypertension                                          | 28,764 (91)                    | 10,589 (69)                    |
| Cerebrovascular Diseases                              | 10,743 (34)                    | 3,646 (26)                     |
| Dementia                                              | 989 (3)                        | 394 (3)                        |
| Chronic Pulmonary Diseases                            | 14,924 (47)                    | 5,522 (39)                     |
| Connective Tissue Diseases                            | 1,486 (5)                      | 638 (5)                        |
| Peptic Ulcer Diseases                                 | 2,757 (9)                      | 1,097 (8)                      |
| Mild Liver Diseases                                   | 3,695 (12)                     | 1,446 (10)                     |
| Moderate to Severe Liver Diseases                     | 785 (2)                        | 351 (3)                        |
| Paraplegia and Hemiplegia                             | 1,182 (4)                      | 510 (4)                        |
| Malignancy                                            | 8,110 (25)                     | 3,434 (24)                     |
| Metastatic Carcinoma                                  | 1,033 (3)                      | 567 (4)                        |
| Depression                                            | 9,957 (31)                     | 3,622 (18)                     |
| Anxiety                                               | 2,102 (6)                      | 314 (2)                        |
| AIDS/HIV                                              | 281 (1)                        | 107 (1)                        |
| <b>Vascular Access; n (%)</b>                         |                                |                                |
| Arteriovenous fistula                                 | 7,494 (23)                     | 2,670 (14)                     |
| Arteriovenous graft                                   | 716 (2)                        | 284 (1)                        |
| Catheter                                              | 3,140 (10)                     | 837 (4)                        |
| Unknown                                               | 20,998 (65)                    | 16,033 (81)                    |
| <b>Laboratory results;<br/>mean (SD)/median (IQR)</b> |                                |                                |
| Serum Sodium (mEq/L)                                  | 139 (3)                        | 138 (3)                        |

|                                                   | <b>Included</b>   | <b>Excluded</b>   |
|---------------------------------------------------|-------------------|-------------------|
|                                                   | <b>(N=32,348)</b> | <b>(N=19,824)</b> |
| Blood Hemoglobin (g/dL)                           | 10.6 (1.6)        | 10.5 (1.9)        |
| Serum Albumin (g/dL)                              | 3.39 (0.6)        | 3.26 (0.7)        |
| Serum Potassium (mEq/L)                           | 4.51 (0.6)        | 4.54 (0.6)        |
| Serum Urea Nitrogen (mg/dL)                       | 64 (48-80)        | 60 (43-79)        |
| Serum Glucose (mg/dL)                             | 130 (50)          | 123 (46)          |
| Blood Hemoglobin A1c (%)                          | 6.8 (1.4)         | 6.6 (1.5)         |
| Serum Cholesterol (mg/dL)                         | 145 (119-176)     | 150 (123-186)     |
| Serum LDL Cholesterol (mg/dL)                     | 78 (59-102)       | 82 (61-111)       |
| Serum HDL Cholesterol (mg/dL)                     | 36 (29-45)        | 36 (29-45)        |
| Serum Triglyceride (mg/dL)                        | 120 (83-176)      | 121 (82-177)      |
| Serum Calcium (mg/dL)                             | 8.71 (0.8)        | 8.56 (0.9)        |
| Serum Phosphate (mg/dL)                           | 5.22 (1.4)        | 5.34 (1.6)        |
| Serum Alkaline Phosphate (U/L)                    | 84 (65-111)       | 86 (66-116)       |
| Serum intact PTH (pg/mL)                          | 221 (126-368)     | 225 (125-387)     |
| Serum Bicarbonate (mEq/L)                         | 22.9 (4.2)        | 22.5 (4.4)        |
| White Blood Cells (1000/mm <sup>3</sup> )         | 7.4 (6.0-9.1)     | 7.5 (6.0-9.6)     |
| Urine albumin/creatinine                          | 349 (34-1810)     | 323 (29-1736)     |
| Body Mass Index (kg/m <sup>2</sup> )              | 30.0 (6.6)        | 28.6 (6.6)        |
| Last outpatient eGFR (mL/min/1.73m <sup>2</sup> ) | 16 (10-26)        | 24 (14-44)        |

Abbreviations: AIDS/HIV: Acquired Immune Deficiency Syndrome/Human Immunodeficiency

Virus; HDL: High-Density Lipoprotein; IQR: Interquartile Range; LDL: Low-density

Lipoprotein; SD: Standard Deviation; PDC: Proportion of Days Covered; PTH: Parathyroid

Hormone

Data are presented as mean (SD), median (IQR) and n (%) as appropriate.
