# Supplementary material
Source: PubMed Central journal article supplement (PMC5035555)
Supplement: NIHMS773109-supplement-5.pdf [file NIHMS773109-supplement-5.pdf]

**Table S2:** Adherence parameters in different medication groups

| <b>Medication groups</b>           | <b>PDC (mean±SD)</b> | <b>MPR (median (IQR))</b> | <b>Non persistence (%)</b> |
|------------------------------------|----------------------|---------------------------|----------------------------|
| <i>Beta-blocker use</i>            | 86±15                | 98 (86-107)               | 18                         |
| <i>Alpha-blocker use</i>           | 87±14                | 98 (88-107)               | 14                         |
| <i>Calcium channel blocker use</i> | 88±14                | 99 (90-108)               | 15                         |
| <i>Loop diuretic use</i>           | 84±17                | 98 (82-110)               | 21                         |
| <i>Thiazide diuretic use</i>       | 82±21                | 96 (75-106)               | 23                         |
| <i>ACEI/ARB use</i>                | 88±15                | 101 (90-112)              | 15                         |
| <i>Direct Vasodilator use</i>      | 83±17                | 97 (80-110)               | 20                         |
| <i>Aspirin use</i>                 | 86±16                | 95 (80-105)               | 25                         |
| <i>Statin use</i>                  | 87±15                | 97 (86-104)               | 18                         |

Abbreviations: ACEI/ARB: Angiotensin Converting Enzyme Inhibitors/Angiotensin Receptor

Blockers; IQR: Interquartile Range; MPR: medication possession ratio; SD: Standard Deviation;

PDC: Proportion of Days Covered;

Data are presented as mean (SD), median (IQR) and n (%) as appropriate.
