# Supplementary material
Source: PubMed Central journal article supplement (PMC5035555)
Supplement: NIHMS773109-supplement-6.pdf [file NIHMS773109-supplement-6.pdf]

**Table S3:** Association of each PDC drug categories with all-cause mortality after dialysis initiation

| <i>Drug category</i>  | <i>Loop diuretic<br/>N=30,592<br/>Event<br/>number=17,610</i>        |          | <i>ACEI/ARB<br/>N=30,592<br/>Event<br/>number=17,610</i>           |          | <i>Calcium channel<br/>blockers<br/>N=30,592<br/>Event number<br/>=17,610</i> |          | <i>Beta-blockers<br/>N=30,592<br/>Event number<br/>=17,610</i> |          | <i>Alpha-blockers<br/>N=30,592<br/>Event number<br/>=17,610</i> |          |
|-----------------------|----------------------------------------------------------------------|----------|--------------------------------------------------------------------|----------|-------------------------------------------------------------------------------|----------|----------------------------------------------------------------|----------|-----------------------------------------------------------------|----------|
|                       | <i>HR<br/>(95%CI)</i>                                                | <i>p</i> | <i>HR<br/>(95%CI)</i>                                              | <i>p</i> | <i>HR<br/>(95%CI)</i>                                                         | <i>p</i> | <i>HR<br/>(95%CI)</i>                                          | <i>p</i> | <i>HR<br/>(95%CI)</i>                                           | <i>p</i> |
| <i>PDC&gt;80%</i>     | 1.00 (reference)                                                     |          | 1.00 (reference)                                                   |          | 1.00 (reference)                                                              |          | 1.00 (reference)                                               |          | 1.00 (reference)                                                |          |
| <i>60%&lt;PDC≤80%</i> | 1.06<br>(1.02-<br>1.11)                                              | 0.004    | 1.00<br>(0.94-<br>1.06)                                            | 0.9      | 0.89<br>(0.84-<br>0.94)                                                       | <0.001   | 1.04<br>(0.99-<br>1.09)                                        | 0.07     | 0.93<br>(0.87-<br>0.99)                                         | 0.04     |
| <i>PDC≤60%</i>        | 1.07<br>(1.01-<br>1.13)                                              | 0.03     | 1.11<br>(1.02-<br>1.21)                                            | 0.01     | 0.97<br>(0.89-<br>1.05)                                                       | 0.4      | 1.08<br>(1.01-<br>1.15)                                        | 0.03     | 0.92<br>(0.83-<br>1.02)                                         | 0.1      |
|                       |                                                                      |          |                                                                    |          |                                                                               |          |                                                                |          |                                                                 |          |
| <i>Drug category</i>  | <i>Direct vasodilators<br/>N=30,592<br/>Event number<br/>=17,610</i> |          | <i>Thiazide diuretic<br/>N=30,592<br/>Event number<br/>=17,610</i> |          | <i>Aspirin<br/>N=30,592<br/>Event number<br/>=17,610</i>                      |          | <i>Statins<br/>N=30,592<br/>Event number<br/>=17,610</i>       |          |                                                                 |          |
|                       | <i>HR<br/>(95%CI)</i>                                                | <i>P</i> | <i>HR<br/>(95%CI)</i>                                              | <i>P</i> | <i>HR<br/>(95%CI)</i>                                                         | <i>p</i> | <i>HR<br/>(95%CI)</i>                                          | <i>p</i> |                                                                 |          |
| <i>PDC&gt;80%</i>     | 1.00 (reference)                                                     |          | 1.00 (reference)                                                   |          | 1.00 (reference)                                                              |          | 1.00 (reference)                                               |          |                                                                 |          |
| <i>60%&lt;PDC≤80%</i> | 0.88<br>(0.82-<br>0.95)                                              | 0.001    | 1.17<br>(1.08-<br>1.27)                                            | <0.001   | 0.90<br>(0.82-<br>0.99)                                                       | 0.03     | 0.97<br>(0.92-<br>1.05)                                        | 0.2      |                                                                 |          |
| <i>PDC≤60%</i>        | 0.94<br>(0.85-<br>1.04)                                              | 0.3      | 1.24<br>(1.14-<br>1.35)                                            | <0.001   | 1.03<br>(0.89-<br>1.21)                                                       | 0.7      | 1.01<br>(0.93-<br>1.08)                                        | 0.9      |                                                                 |          |

**Abbreviations:** ACEI/ARB: Angiotensin Converting Enzyme Inhibitors/Angiotensin Receptor Blockers; CCI: Charlson comorbidity index; CI: confidence interval; ESRD: end stage renal disease; eGFR: estimated glomerular filtration rate; HR: hazard ratio; PDC: proportion of days covered

Model1: unadjusted

Model 2: adjusted for age, sex, race/ethnicity, marital status and ZIP code

Model 3: adjusted for age, sex, race/ethnicity, marital status, ZIP code, CCI and presence of diabetes, congestive heart failure, cardiovascular/cerebrovascular disease, presence of depression, presence of anxiety and type of vascular access

Model 4: adjusted for age, sex, race/ethnicity, marital status, ZIP code, CCI, presence of diabetes, congestive heart failure, cardiovascular/cerebrovascular disease, presence of depression, presence of anxiety, type of vascular access, and blood/serum hemoglobin, bicarbonate, albumin, urea nitrogen, last eGFR before ESRD
