# Supplementary material
Source: PubMed Central journal article supplement (PMC5035555)
Supplement: NIHMS773109-supplement-7.pdf [file NIHMS773109-supplement-7.pdf]

**Table S4:** Association of MPR with all-cause mortality after dialysis initiation

|                           | <i>Model 1</i>                                           |          | <i>Model 2</i>                                           |          | <i>Model 3</i>                                           |          | <i>Model 4</i>                                          |          |
|---------------------------|----------------------------------------------------------|----------|----------------------------------------------------------|----------|----------------------------------------------------------|----------|---------------------------------------------------------|----------|
|                           | <i>N=32,348</i><br><i>Event number</i><br><i>=18,608</i> |          | <i>N=30,943</i><br><i>Event number</i><br><i>=17,789</i> |          | <i>N=30,592</i><br><i>Event number</i><br><i>=17,610</i> |          | <i>N=13,693</i><br><i>Event number</i><br><i>=6,904</i> |          |
|                           | <i>HR</i><br><i>(95%CI)</i>                              | <i>p</i> | <i>HR</i><br><i>(95%CI)</i>                              | <i>p</i> | <i>HR</i><br><i>(95%CI)</i>                              | <i>p</i> | <i>HR (95%CI)</i>                                       | <i>p</i> |
| <i>MPR≥100%</i>           | 0.92 (0.89-0.95)                                         | <0.001   | 0.96 (0.93-0.99)                                         | 0.01     | 0.96 (0.93-0.99)                                         | 0.02     | 0.98 (0.93-1.03)                                        | 0.3      |
| <i>100%&gt;MPR&gt;80%</i> | 1.00 (reference)                                         |          | 1.00 (reference)                                         |          | 1.00 (reference)                                         |          | 1.00 (reference)                                        |          |
| <i>60%&lt;MPR≤80%</i>     | 1.04 (0.99-1.09)                                         | 0.1      | 1.15 (1.10-1.21)                                         | <0.001   | 1.11 (1.06-1.17)                                         | <0.001   | 1.12 (1.02-1.22)                                        | 0.01     |
| <i>MPR≤60%</i>            | 0.98 (0.89-1.07)                                         | 0.6      | 1.24 (1.13-1.36)                                         | <0.001   | 1.19 (1.08-1.30)                                         | <0.001   | 1.18 (0.99-1.41)                                        | 0.06     |

Abbreviations: CCI: Charlson comorbidity index; CI: confidence interval; ESRD: end stage renal disease; GFR: estimated glomerular filtration rate; HR: hazard ratio; MPR: medication possession ratio

Model1: unadjusted

Model 2: adjusted for age, sex, race/ethnicity, marital status and ZIP code

Model 3: adjusted for age, sex, race/ethnicity, marital status, ZIP code, CCI and presence of diabetes, congestive heart failure, cardiovascular/cerebrovascular disease, presence of depression, presence of anxiety and type of vascular access

Model 4: adjusted for age, sex, race/ethnicity, marital status, ZIP code, CCI, presence of diabetes, congestive heart failure, cardiovascular/cerebrovascular disease, presence of depression, presence of anxiety, type of vascular access, and blood/serum hemoglobin, bicarbonate, albumin, urea nitrogen, last eGFR before ESRD
