# Supplementary material
Source: PubMed Central journal article supplement (PMC5035555)
Supplement: NIHMS773109-supplement-8.pdf [file NIHMS773109-supplement-8.pdf]

**Table S5:** Association of MPR with cardiovascular mortality after dialysis initiation

|                           | <i>Model 1</i>              |          | <i>Model 2</i>              |          | <i>Model 3</i>              |          | <i>Model 4</i>            |          |
|---------------------------|-----------------------------|----------|-----------------------------|----------|-----------------------------|----------|---------------------------|----------|
|                           | <i>N=32,065</i>             |          | <i>N=30,692</i>             |          | <i>N=30,366</i>             |          | <i>N=13,606</i>           |          |
|                           | <i>Event number=5,375</i>   |          | <i>Event number=5,132</i>   |          | <i>Event number=5,066</i>   |          | <i>Event number=1,951</i> |          |
|                           | <i>HR</i><br><i>(95%CI)</i> | <i>p</i> | <i>HR</i><br><i>(95%CI)</i> | <i>p</i> | <i>HR</i><br><i>(95%CI)</i> | <i>p</i> | <i>HR (95%CI)</i>         | <i>p</i> |
| <i>MPR≥100%</i>           | 0.94 (0.89-0.99)            | 0.04     | 0.97 (0.91-1.03)            | 0.3      | 0.97 (0.92-1.03)            | 0.4      | 0.99 (0.90-1.09)          | 0.8      |
| <i>100%&gt;MPR&gt;80%</i> | 1.00 (reference)            |          | 1.00 (reference)            |          | 1.00 (reference)            |          | 1.00 (reference)          |          |
| <i>60%&lt;MPR≤80%</i>     | 1.02 (0.93-1.12)            | 0.7      | 1.13 (1.03-1.23)            | 0.01     | 1.08 (0.99-1.19)            | 0.1      | 1.11 (0.94-1.31)          | 0.2      |
| <i>MPR≤60%</i>            | 0.98 (0.83-1.16)            | 0.9      | 1.21 (1.02-1.44)            | 0.03     | 1.18 (0.99-1.40)            | 0.06     | 1.06 (0.74-1.50)          | 0.8      |

Abbreviations: CCI: Charlson comorbidity index; CI: confidence interval; ESRD: end stage renal disease; GFR: estimated glomerular filtration rate;

HR: hazard ratio; MPR: medication possession ratio

Model1: unadjusted

Model 2: adjusted for age, sex, race/ethnicity, marital status and ZIP code

Model 3: adjusted for age, sex, race/ethnicity, marital status, ZIP code, CCI and presence of diabetes, congestive heart failure, cardiovascular/cerebrovascular disease, presence of depression, presence of anxiety and type of vascular access

Model 4: adjusted for age, sex, race/ethnicity, marital status, ZIP code, CCI, presence of diabetes, congestive heart failure, cardiovascular/cerebrovascular disease, presence of depression, presence of anxiety, type of vascular access, and blood/serum hemoglobin, bicarbonate, albumin, urea nitrogen, last eGFR before ESRD
